# Supplementary material for: Particulate photocatalytic reactors with spectrum-splitting function for artificial photosynthesis
Source: Royal Society of Chemistry journal article supplement (doi:10.1039/d1cp00597a), 2021-01-01
Supplement: d1cp00597a1.pdf [file d1cp00597a1.pdf]

# Particulate photocatalytic reactors with spectrum-splitting function for artificial photosynthesis

Yasuhiko Takeda,\* Tomiko M. Suzuki, Shunsuke Sato, and Takeshi Morikawa

Toyota Central Research and Development Laboratories, Inc., 41-1, Yokomichi, Nagakute, Aichi 480-1192, Japan

\*Corresponding author, takeda@mosk.tytlabs.co.jp

## Supplementary Information

### S.1 Impacts of material properties

The change in  $J_{\text{sup}}$  dependent on  $E_g$  and  $\Delta\mu_{\text{op}}$  for the single-material reactor was investigated in detail, for interpretation of the impact of  $E_g$  deviation shown in Fig. 5. Figure S1 shows  $J_{\text{sup}}$ ,  $qN_{\text{rad}}$ , and  $qN_{\text{nonrad}}$  as functions of  $\Delta\mu_{\text{op}}$  for the single-material reactor optimized for  $\text{H}_2$  production. When  $\Delta\mu_{\text{op}}$  is small,  $J_{\text{sup}}$  approximately equals  $qN_{\text{abs}}$ , and then starts to decrease owing to rapidly increasing  $qN_{\text{nonrad}}$ . On the other hand,  $qN_{\text{rad}}$  is negligibly small leading to no impact on  $J_{\text{sup}}$  under the present condition. The optimal  $E_g$  is determined so that  $J_{\text{sup}}$  is slightly smaller than  $qN_{\text{abs}}$  at  $\Delta\mu_{\text{op}} = 1.6$  eV.

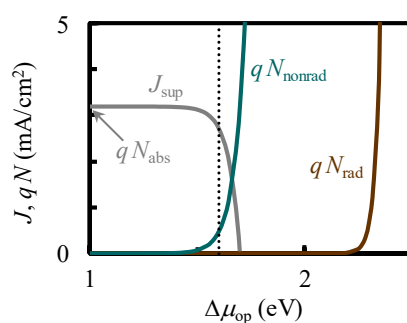

**Fig. S1** Relations of  $J_{\text{sup}}$ ,  $qN_{\text{rad}}$ , and  $qN_{\text{nonrad}}$  vs.  $\Delta\mu_{\text{op}}$  of the single-material reactor ( $E_g = 2.79$  eV) for  $\text{H}_2$  production ( $\Delta\mu_{\text{op}} = 1.6$  eV).  $m_c = 2 m_0$ ,  $\tau_{\text{nonrad}} = 1$  ns, and  $w = 4$   $\mu\text{m}$  are adopted. The dotted line shows  $\Delta\mu_{\text{op}} = 1.6$  eV.

When  $E_g$  increases from the optimal value (2.79 eV),  $N_{\text{abs}}$  and consequently  $J_{\text{sup}}$  in the small  $\Delta\mu_{\text{op}}$  range decrease, while  $J_{\text{sup}}$  is approximately constant up to a higher  $\Delta\mu_{\text{op}}$ , as depicted in Fig. S2. Therefore,  $J_{\text{sup}}$  at  $\Delta\mu_{\text{op}} = 1.6$  eV gradually decreases with increasing  $E_g$ . On the other hand,  $J_{\text{sup}}$  starts to decrease at a smaller  $\Delta\mu_{\text{op}}$  when  $E_g$  is smaller. Therefore,  $J_{\text{sup}}$  at  $\Delta\mu_{\text{op}} = 1.6$  eV is dramatically lower.

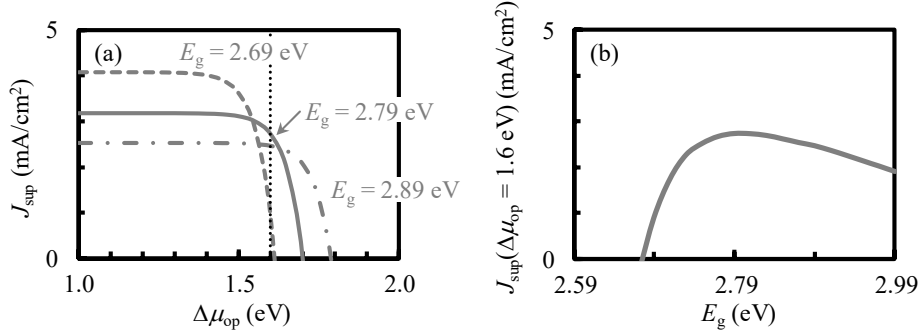

**Fig. S2** (a) Relations of  $J_{\text{sup}}$  vs.  $\Delta\mu_{\text{op}}$  of the single-material reactors with different  $E_g$ .  $m_c = 2 m_0$ ,  $\tau_{\text{nonrad}} = 1$  ns, and  $w = 4$   $\mu\text{m}$  are adopted. (b) Dependence of  $J_{\text{sup}}$  at  $\Delta\mu_{\text{op}} = 1.6$  eV on  $E_g$ . The dotted line shows  $\Delta\mu_{\text{op}} = 1.6$  eV.

The relation of  $J_{\text{sup}}$  vs.  $\Delta\mu_{\text{op}}$  is applied to solar cells. When a solar cell is combined with a power conditioner,  $E_g$  is optimized so that the output power density,  $P_{\text{out}} = N_{\text{sup}} \Delta\mu_{\text{op}}$ , is the maximal. The  $\Delta\mu_{\text{op}}$  point at which  $P_{\text{out}}$  as a function of  $\Delta\mu_{\text{op}}$  is the maximal,  $P_{\text{out}}^{(\text{max})}$ , i.e., so-called the maximal power point shifts dependent on  $E_g$ , as shown in Fig. S3. However, the impact of  $E_g$  deviation on  $P_{\text{out}}^{(\text{max})}$  is extremely weaker than that on  $J_{\text{sup}}$  at a given  $\Delta\mu_{\text{op}}$  for the photocatalytic reactors.

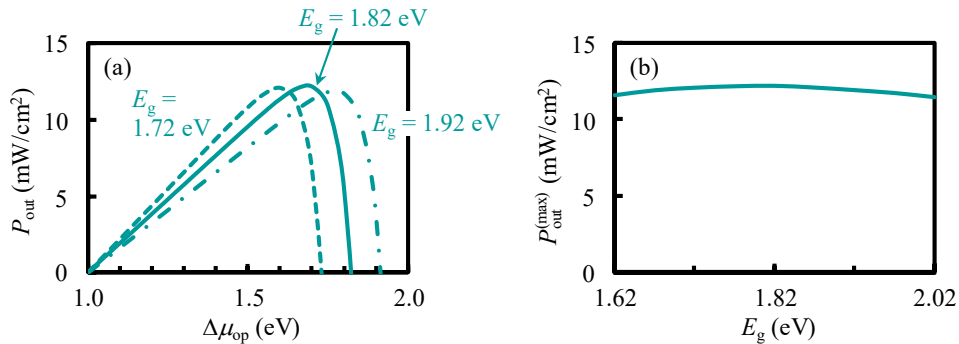

**Fig. S3** (a) Relations of  $P_{\text{out}}$  vs.  $\Delta\mu_{\text{op}}$  of single-junction solar cells with different  $E_g$ .  $m_c = 2 m_0$ ,  $\tau_{\text{nonrad}} = 1$  ns, and  $w = 4$   $\mu\text{m}$  are adopted. (b) Dependence of  $P_{\text{out}}^{(\text{max})}$  on  $E_g$ .

When  $m_c$  is small and  $\tau_{\text{nonrad}}$  is long,  $N_{\text{nonrad}}$  reduces proportionally to  $m_c^{3/2}/\tau_{\text{nonrad}}$ . The effect of the reduction in  $N_{\text{nonrad}}$  was investigated in detail. For example, the optimal  $E_g$  values in the WG-NG reactor for  $\text{H}_2$  production are  $E_{g\text{WG}} = 2.30$  eV and  $E_{g\text{NG}} = 1.82$  eV at  $m_c = 2 m_0$  and  $\tau_{\text{nonrad}} = 1$  ns. The carrier supply rates of the WG and NG compartments ( $N_{\text{WG}}$  and  $N_{\text{NG}}$ ) converted to the current densities as functions of  $\Delta\mu_{\text{op}}$  are depicted in Fig. S4(a). The  $E_{g\text{WG}}$  and  $E_{g\text{NG}}$  are optimized so that  $N_{\text{nonrad}}$  is negligibly small and hence  $J_{\text{sup}}$  is approximately constant up to  $\Delta\mu_{\text{op}} = 1.6$  eV. When  $N_{\text{nonrad}}$  reduces at  $m_c = 0.3 m_0$  and  $\tau_{\text{nonrad}} = 10$  ns whereas  $E_{g\text{WG}} = 2.30$  eV and  $E_{g\text{NG}} = 1.82$  eV remain,  $J_{\text{sup}}$  is constant up to a higher  $\Delta\mu_{\text{op}}$  of 2.2 eV, as shown in Fig. S4(b). Then,  $E_{g\text{WG}}$  and  $E_{g\text{NG}}$  are again optimized so that  $J_{\text{sup}}$  starts to decrease at around  $\Delta\mu_{\text{op}} = 1.6$  eV and instead  $N_{\text{abs}}$  is as large as possible. The results are shown in Fig. S4(c);  $q N_{\text{WG}}$  and  $q N_{\text{NG}}$  at a small  $\Delta\mu_{\text{op}}$  increase owing to the narrower values of  $E_{g\text{WG}} = 2.04$  eV and  $E_{g\text{NG}} = 1.52$  eV. Consequently,  $J_{\text{sup}}$  at  $\Delta\mu_{\text{op}} = 1.6$  eV increase as depicted in Fig. 6(a).

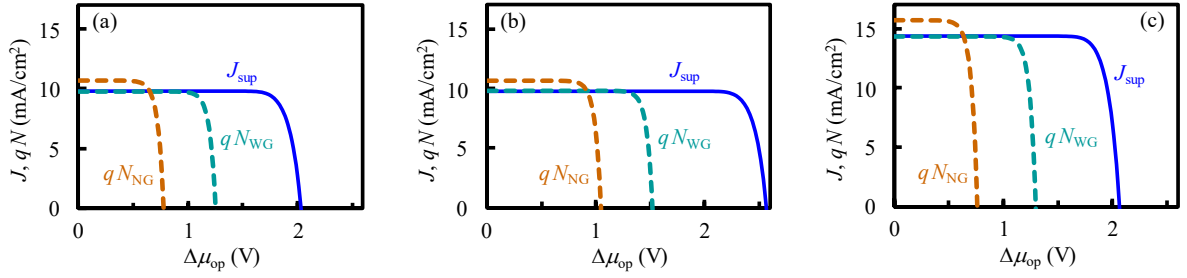

**Fig. S4**  $J_{\text{sup}}$  vs.  $\Delta\mu_{\text{op}}$  relations of the WG-NG reactor for  $\text{H}_2$  production ( $\Delta\mu_{\text{op}} = 1.6$  eV), and  $q N_{\text{WG}}$  and  $q N_{\text{NG}}$  vs.  $\Delta\mu_{\text{op}}$  of the WG and NG compartments.  $w = 4 \mu\text{m}$ . The following material parameters are adopted: (a)  $E_{g\text{WG}} = 2.30$  eV,  $E_{g\text{NG}} = 1.82$  eV,  $m_c = 2 m_0$ , and  $\tau_{\text{nonrad}} = 1$  ns; (b)  $E_{g\text{WG}} = 2.30$  eV,  $E_{g\text{NG}} = 1.82$  eV,  $m_c = 0.3 m_0$ , and  $\tau_{\text{nonrad}} = 10$  ns; (c)  $E_{g\text{WG}} = 2.04$  eV,  $E_{g\text{NG}} = 1.52$  eV,  $m_c = 0.3 m_0$ , and  $\tau_{\text{nonrad}} = 10$  ns.

The optimal  $E_g$  values for the other reactors are summarized in Fig. S5. They also narrow with decreasing  $m_c$  and increasing  $\tau_{\text{nonrad}}$ . Thus,  $J_{\text{sup}}$ ,  $\eta_{\text{H}_2}$ , and  $\eta_{\text{CO}}$  improve, as shown in Fig. 6.

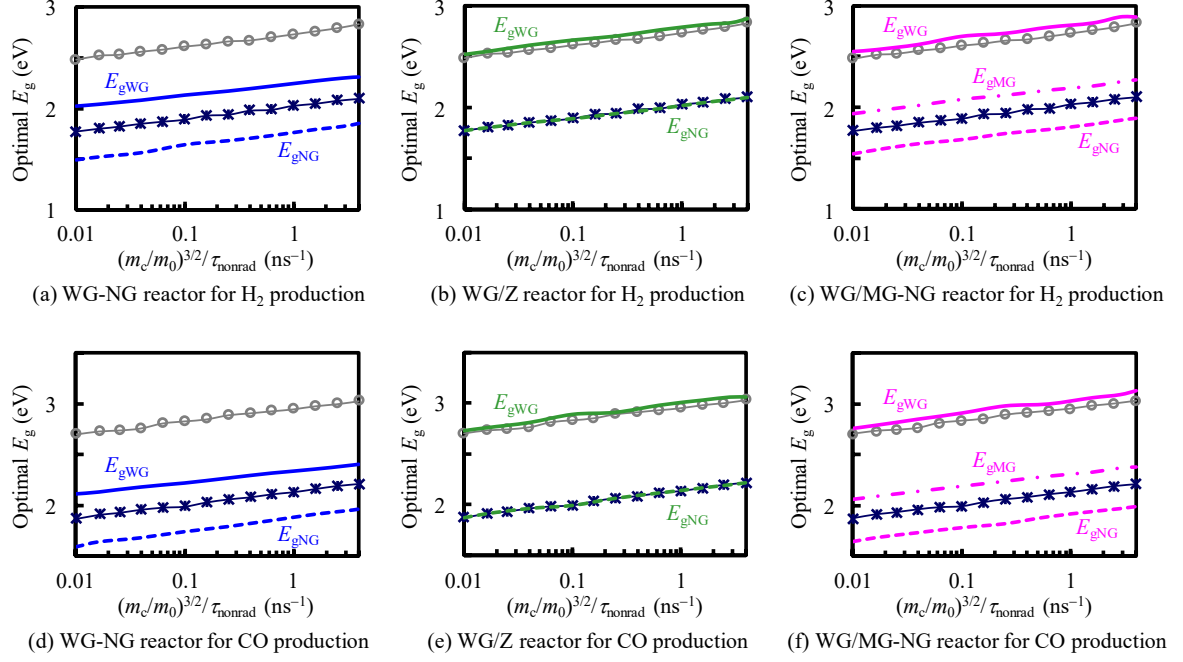

**Fig. S5** Impacts of the carrier effective mass ( $m_c$ ) and nonradiative recombination lifetime ( $\tau_{\text{nonrad}}$ ) on the optimal  $E_g$  values of the photocatalysts used in the spectrum-splitting reactors. The values for the single-material reactors (gray open circles) and conventional Z-scheme reactors (dark blue asterisks) are also shown for comparison. (a)–(c)  $\text{H}_2$  production ( $\Delta\mu_{\text{op}} = 1.6$  eV) and (d)–(f) CO production ( $\Delta\mu_{\text{op}} = 1.8$  eV).  $\Delta G = 0.2$  eV and  $w = 4$   $\mu\text{m}$  are adopted.

As depicted in Fig. 7,  $J_{\text{sup}}$ ,  $\eta_{\text{H}_2}$ , and  $\eta_{\text{CO}}$  decrease with increasing  $\Delta G$ . The  $E_{\text{g}}$  values optimized for each  $\Delta G$  are plotted in Fig. S6. The  $N_{\text{abs}}$  and  $N_{\text{gen}}$  values of the two kinds of the photocatalysts involved in the two-step excitation decrease with increasing  $\Delta G$ , because the increase in the summation of the two  $E_{\text{g}}$  values is approximately the same as the increase in  $\Delta G$ . For example, the optimal values in the WG-NG reactor for  $\text{H}_2$  production (Fig. S6(a)) are  $E_{\text{gWG}} = 2.30$  eV and  $E_{\text{gNG}} = 1.82$  eV at  $\Delta G = 0.2$  eV, whereas they increase to  $E_{\text{gWG}} = 2.49$  eV and  $E_{\text{gNG}} = 2.06$  eV (the summation increases by 0.43 eV) at  $\Delta G = 0.6$  eV. On the other hand,  $\Delta G = 0$  eV is feasible for the WG/Z reactor when an all-solid-state Z-scheme cell is employed, leading to a narrower  $E_{\text{gNG}}$  and a resultant larger  $J_{\text{sup}}$  as shown in Fig. 7.

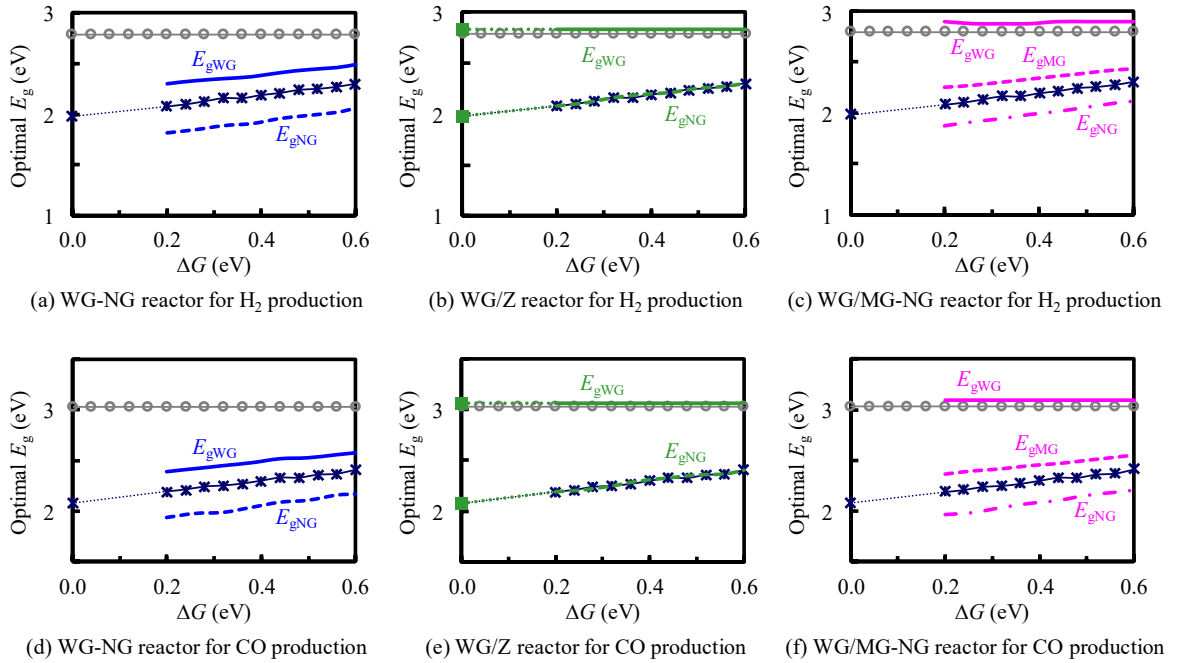

**Fig. S6** Impacts of the driving force for electron transfer via the redox mediators ( $\Delta G$ ) on the optimal  $E_{\text{g}}$  values of the photocatalysts used in the spectrum-splitting reactors. The values for the single-material reactors (gray open circles) and conventional Z-scheme reactors (dark blue asterisks) are also shown for comparison. (a)–(c)  $\text{H}_2$  production ( $\Delta\mu_{\text{op}} = 1.6$  eV), and (d)–(f) CO production ( $\Delta\mu_{\text{op}} = 1.8$  eV).  $m_{\text{c}} = 2 m_0$ ,  $\tau_{\text{nonrad}} = 1$  ns and  $w = 4$   $\mu\text{m}$  are adopted.  $\Delta G = 0.2$  eV is the lower limit for the WG-MG and WG/MG-NG reactors using two-compartment cells, whereas  $\Delta G = 0$  eV is feasible for the Z-scheme and WG/Z (solid green squares) reactors when all-solid-state Z-scheme cells are employed.

## S.2 Impacts of solar spectrum variation

The  $J_{\text{sup}}$  values of the reactors optimized for the AM 1.5G spectrum change when these reactors operate under different solar spectra, as depicted in Fig. 8. Figure S7 shows the  $E_g$  values of the photocatalysts used in the reactors optimized for  $\text{H}_2$  production ( $\Delta\mu_{\text{op}} = 1.6$  eV) under the AM 1.5G illumination, in addition to the spectral solar photon flux ( $n_{\text{sun}}(\hbar\omega)$ ) [1, 2].

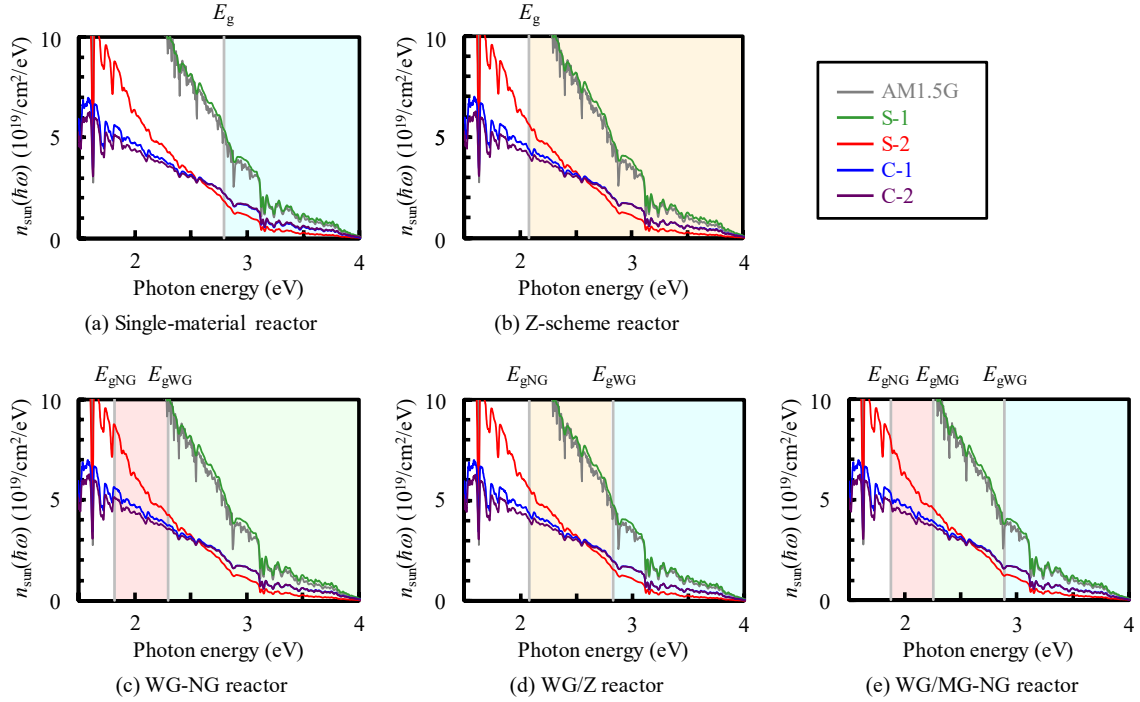

**Fig. S7** Spectral photon fluxes ( $n_{\text{sun}}(\hbar\omega)$ ) of the AM1.5G and measured solar spectra [1, 2], and  $E_g$  values of the photocatalysts used in the reactors optimized for  $\text{H}_2$  production ( $\Delta\mu_{\text{op}} = 1.6$  eV) under the AM1.5G illumination.

The  $J_{\text{sup}}$  values of the single-material and Z-scheme reactors are directly related to  $n_{\text{sun}}(\hbar\omega)$  at higher  $\hbar\omega$  than  $E_g$ . Therefore, the magnitude relations among the  $J_{\text{sup}}$  values under the different spectra reflect  $n_{\text{sun}}(\hbar\omega)$  shown in Figs. S7(a) and S7(b), respectively, integrated from  $E_g$  to infinity, i.e.,  $N_{\text{gen}}(E_g, \infty)$  (see eq (2)). The optimal  $E_g$  for the single-material reactor is 2.79 eV. The S-1 spectrum exhibits the largest  $n_{\text{sun}}(\hbar\omega)$  in this range, followed by AM 1.5G, C-1, C-2, and S-2 in descending order, and the order of the  $J_{\text{sup}}$  values is the same. As for the conventional Z-scheme reactor, the S-2 includes more photons than the C-1 and C-2 in the range from the optimal  $E_g$  of 2.08 eV to 2.55 eV, whereas the magnitude relation of  $n_{\text{sun}}(\hbar\omega)$  reverses in the higher-energy range. This reduces the differences in the  $\hbar\omega$ -integrated values, i.e.,  $N_{\text{gen}}(E_g, \infty)$  and resultant  $J_{\text{sup}}$

values among these three spectra.

As for the spectrum-splitting WG/Z reactor,  $J_{\text{sup}}$  is similarly affected by the spectrum variation. However,  $n_{\text{sn}}(\hbar\omega)$  in the absorption range of the Z-scheme cell on the backside (2.08–2.83 eV) should be integrated with a weighting factor of 1/2 because two photons are consumed for a single carrier supply.

On the other hand,  $J_{\text{sup}}$  of the WG-NG reactor is determined by the smaller one of the  $N_{\text{abs}}$  values of the WG and NG compartments, i.e.,  $N_{\text{gen}}(E_{\text{gWG}}, \infty)$  and  $N_{\text{gen}}(E_{\text{gNG}}, E_{\text{gWG}})$ . This changes the magnitude relation of the  $J_{\text{sup}}$  values under the different spectra from that for the three configurations described above. The C-1 and C-2 exhibit larger  $n_{\text{sn}}(\hbar\omega)$  than the S-2 in the most of the absorption range of the WG-PCs over 2.30 eV. By contrast,  $n_{\text{sn}}(\hbar\omega)$  in the S-2 is larger in the NG-PC absorption range of 1.82–2.30 eV. The latter effect surpasses the former, and consequently  $J_{\text{sup}}$  under the S-2 is slightly larger than those under the C-1 and C2. As for the WG/MG-NG reactor, the two factors for the single-material reactor and WG-NG reactor compete mutually, and as a result, the three  $J_{\text{sup}}$  values under the S-2, C-1, and C-2 are close to each other.

### S.3 Impacts of the diameter and total volume on scattering and absorption by the photocatalyst particles

Figure S8 shows the dependence of the scattering cross section ( $C_{\text{sca}}$ ) and absorption cross section ( $C_{\text{abs}}$ ) on the diameter of the photocatalyst particle ( $d$ ) suspended in water. In addition to an increase in  $C_{\text{sca}}$  with  $d$ ,  $C_{\text{sca}}/S$  and  $C_{\text{sca}}/V$  that are the values normalized by the geometric cross section,  $S$ , and volume,  $V$ , respectively, also increase. By contrast,  $C_{\text{abs}}/V$  scarcely changes. This means that the scattering function enhances with increasing  $d$  at a constant  $w$  whereas the absorption function does not change, because the mean-free passes for the scattering and absorption are  $\lambda_{\text{sca}} = (w C_{\text{sca}}/V)^{-1}$  and  $\lambda_{\text{abs}} = (w C_{\text{abs}}/V)^{-1}$ , respectively (see eqs (16) and (17)). As a result, the absorptivity for the high-energy photons lowers and instead the reflectivity increases with increasing  $d$ , as shown in Fig. 9(a).

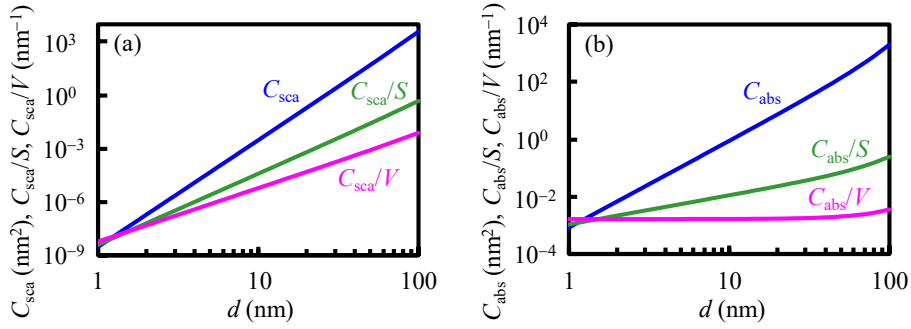

**Fig. S8** (a) Scattering cross section ( $C_{\text{sca}}$ ) of the photocatalyst particle suspended in water as functions of the diameter ( $d$ ), and the normalized values by the geometric cross section ( $S$ ) and volume ( $V$ ). (b) Absorption cross section ( $C_{\text{sca}}$ ) and normalized values. Photon energy is 2.40 eV that is higher than the optimal  $E_{\text{gWG}} = 2.30$  eV of the WG-PCs used in the WG-NG reactor for  $\text{H}_2$  production ( $\Delta\mu_{\text{op}} = 1.6$  eV) by 0.10 eV. Complex refractive index of the WG-PCs of  $n + ik = 3.0 + i0.17$ , and refractive index of water of 1.33 are adopted (see Section 4.4).

In the present model described in Section 3.4, the incident light is scattered sequentially by the photocatalyst particles with no interaction between the particles. This independent scattering model has been empirically found to be applicable when the following relation is fulfilled [3]:

$$\left( \frac{0.9047}{f^{1/3}} - 1 \right) \frac{nd}{\lambda} > 0.5 \quad (\text{S1})$$

where  $f$  is the volume fraction of the particles,  $n$  the refractive index of the medium ( $n = 1.33$  for water), and  $\lambda$  the wavelength of light. When the thickness of the WG



compartment is 1 cm,  $w = 1\text{--}6\ \mu\text{m}$  adopted in Fig. 10 correspond to  $f = 1\text{--}6 \times 10^{-4}$ . The left-side value of eq (S1) ranges from 0.91 ( $w = 1\ \mu\text{m}$ ) to 0.48 ( $w = 6\ \mu\text{m}$ ) under the present condition of  $\lambda = 540\ \text{nm}$  (photon energy 2.30 eV) and  $d = 20\ \text{nm}$ . Therefore, the independent scattering model provides accurate values except the case when  $w$  is close to  $6\ \mu\text{m}$ . On the other hand, the relative error of the model increases when  $d$  decreases at a constant  $w$  because the distance between the neighboring particles shortens [4]. Nevertheless, the results shown in Fig. 9 hold; both the absorptivity for the high-energy photons and transmissivity for the low-energy photons are close to unity at  $d < 10\ \text{nm}$ , because  $C_{\text{sca}}/V$  is extremely small whereas  $C_{\text{abs}}/V$  is almost constant independent of  $d$  as is clear from Fig. S8.

## References

- [1] Solar Radiation Database, New Energy and Industrial Technology Development Organization (NEDO), <https://www.nedo.go.jp/library/nissharyou.html>. (accessed January 2021).
- [2] Reference Solar Spectral Irradiance: Air Mass 1.5, National Renewable Energy Laboratory, <https://rredc.nrel.gov/solar/spectra/am1.5/>. (accessed January 2021).
- [3] C. L. Tien, and B. L. Drolen, Thermal radiation in particulate media with dependent and independent scattering, *Ann. Rev. Heat Transf.*, 1987, **1**, 1–32.
- [4] T. Galy, D. Huang, and L. Pilon, Revisiting independent versus dependent scattering regimes in suspensions or aggregates of spherical particles, *J. Quant. Spectrosc. Radiat. Transf.*, 2020, **246**, 106924.
